# Supplementary material
Source: publisher figshare collection journal article supplement (https://springernature.figshare.com/ndownloader/files/12659474)
Supplement: Supplementary file [file 12659474]

Figure S1

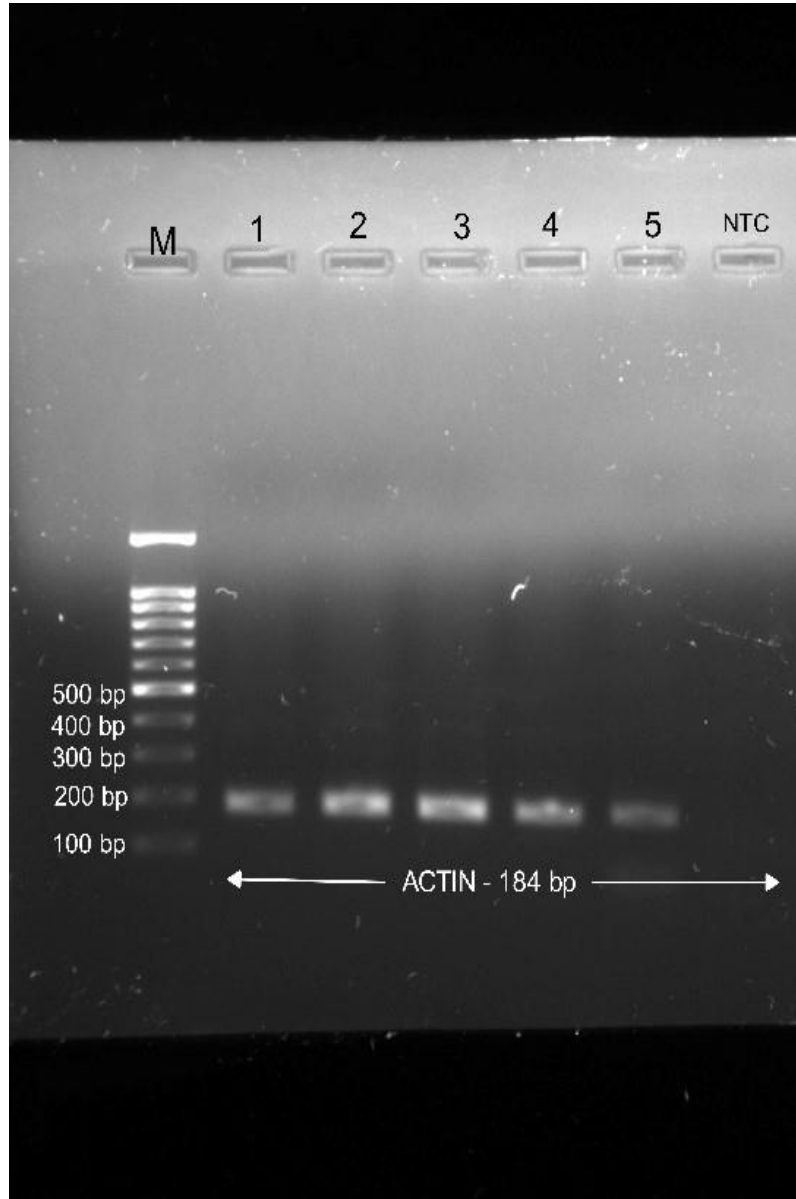

Gel image of *ACTB*
